# Supplementary material for: Early effects of the antineoplastic agent salinomycin on mitochondrial function
Source: PubMed Central journal article supplement (PMC4632293; doi:10.1038/cddis.2015.263), 2015-10-22

# Figure S1

Salinomycin

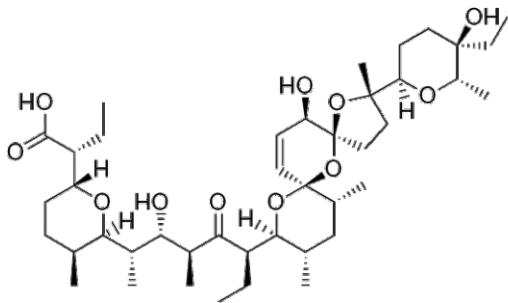

Valinomycin

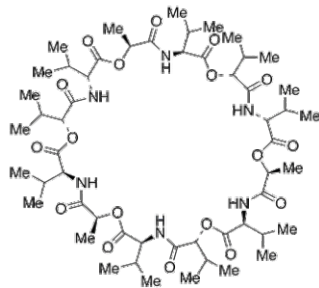

Nigericin

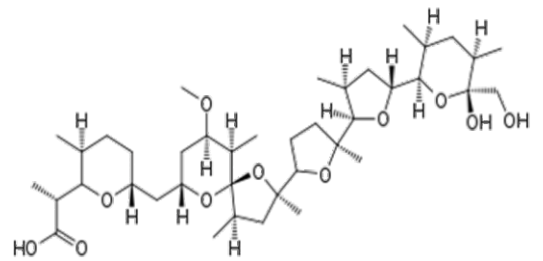

# Figure S2

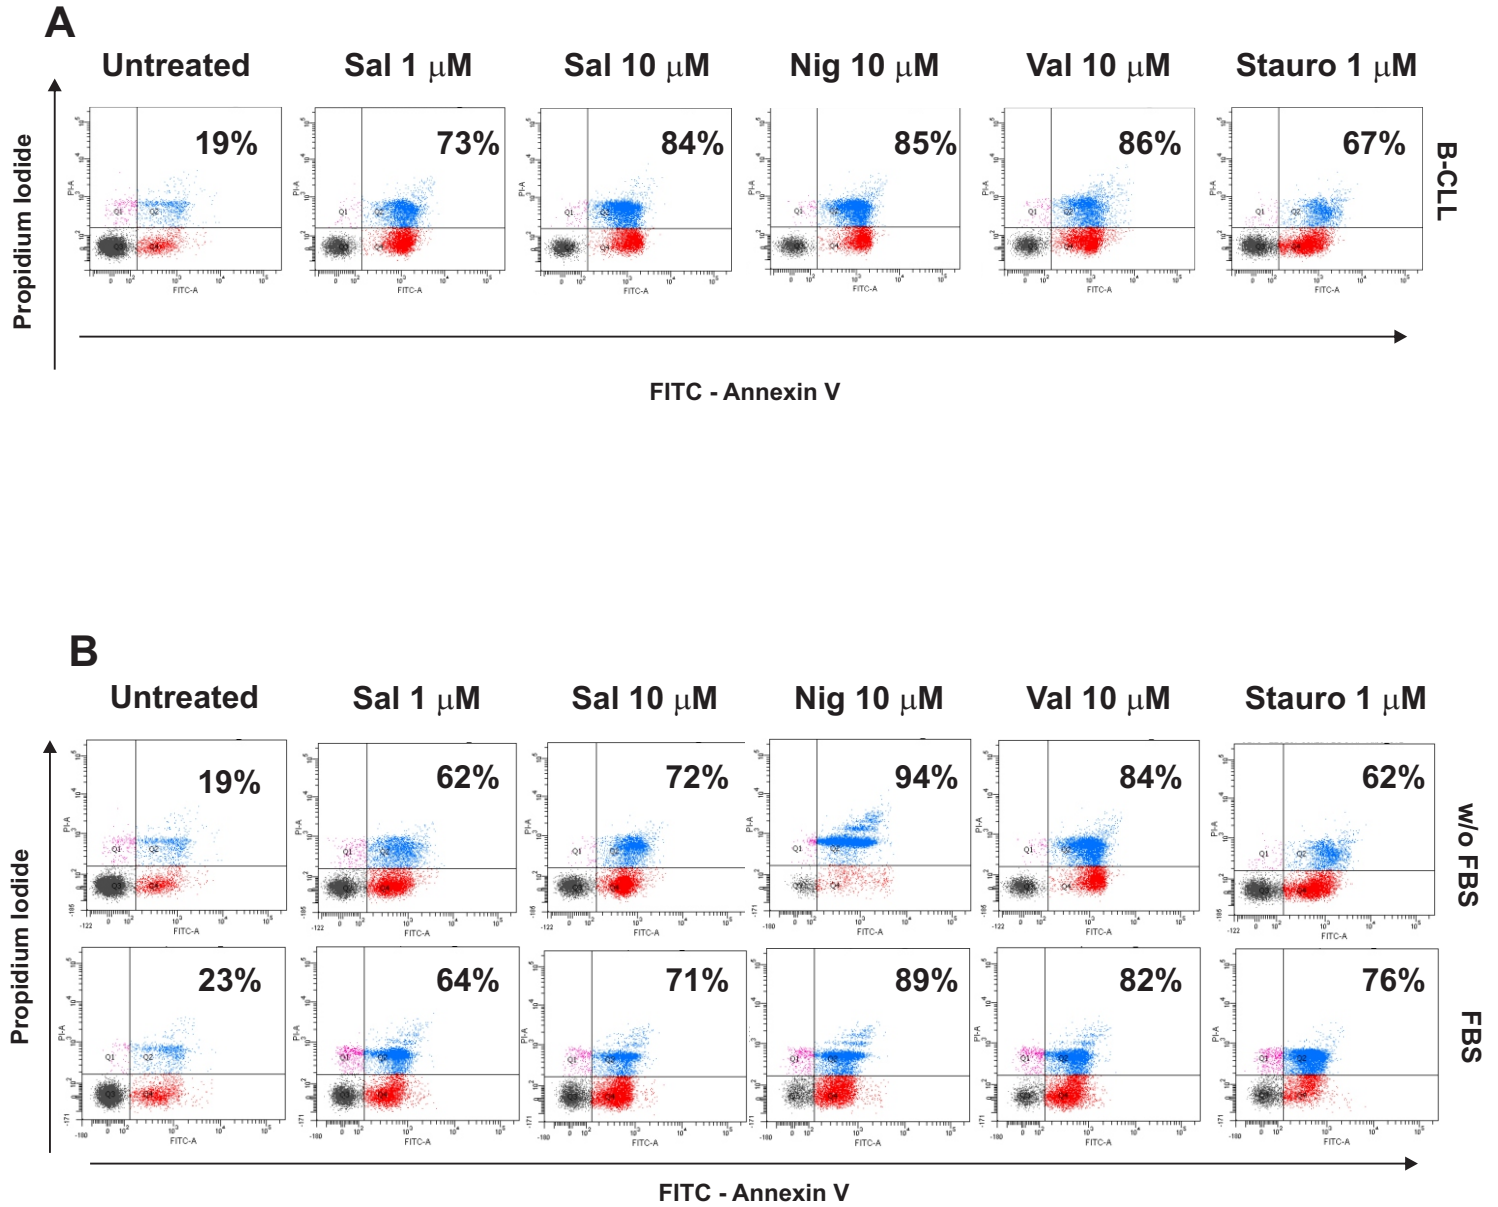

**Figure S3**

**WT MEF cells**

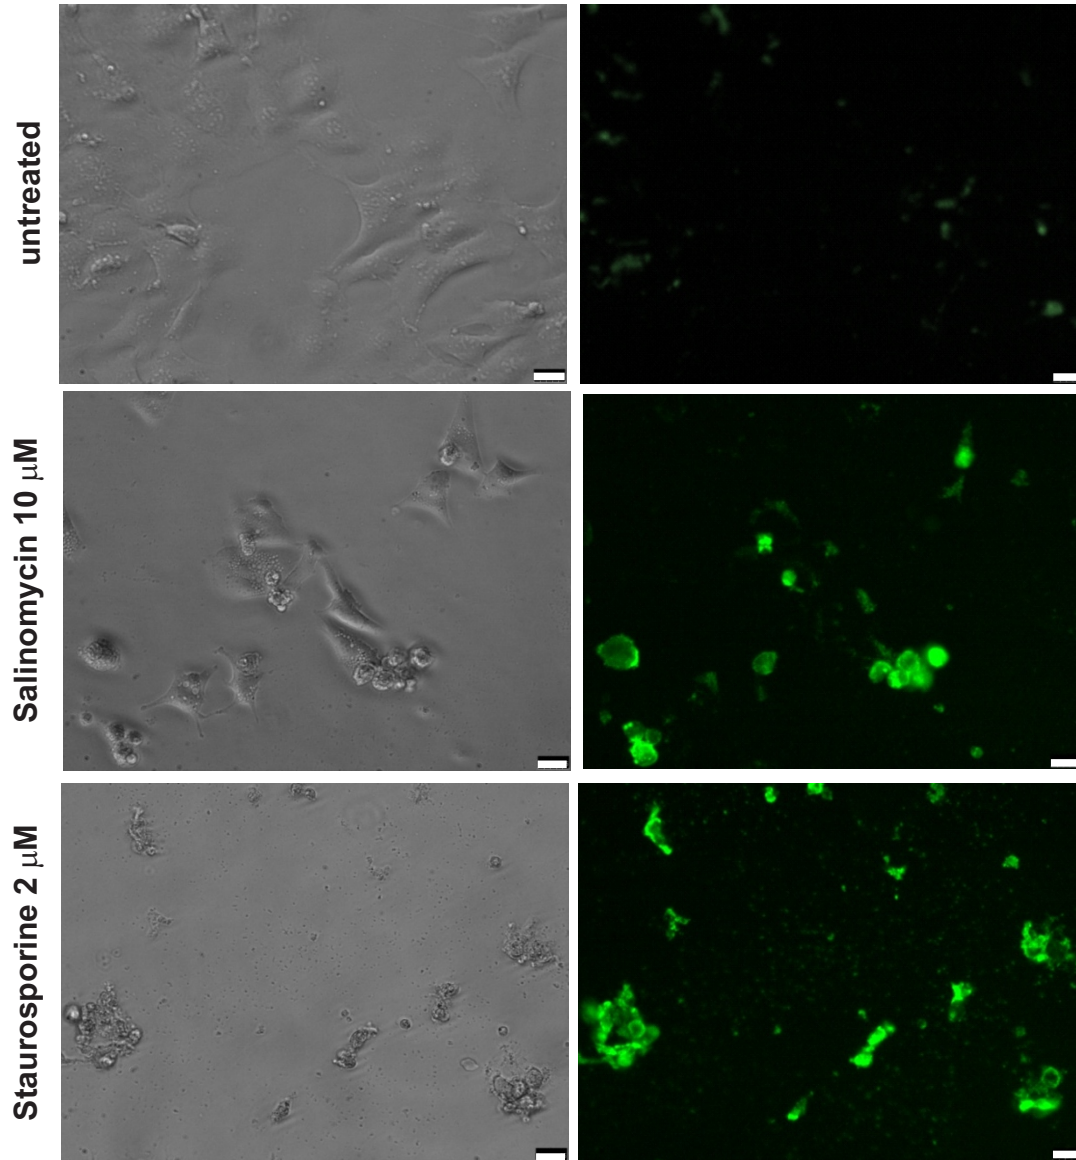

# Figure S4

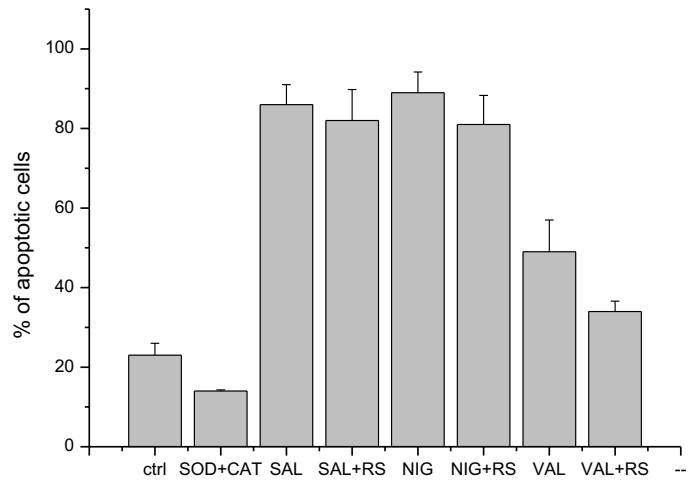

# Figure S5

ROS release

t = 0 min

t = 60 min

untreated

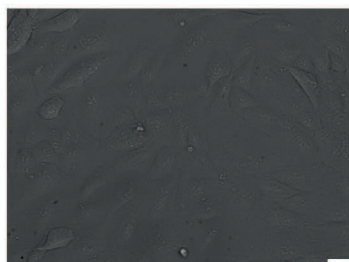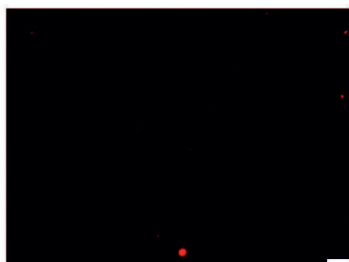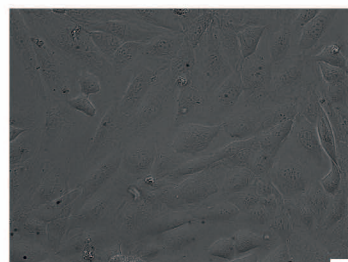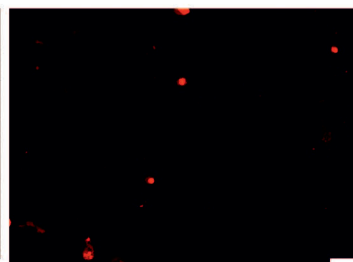

Sal 1  $\mu$ M

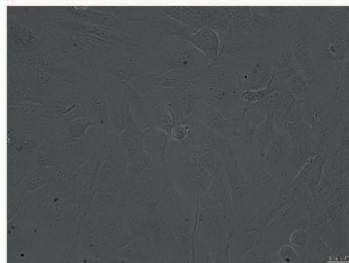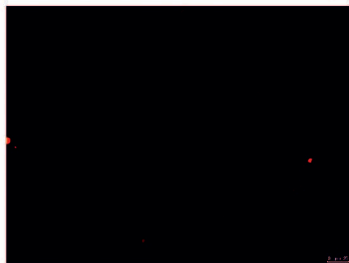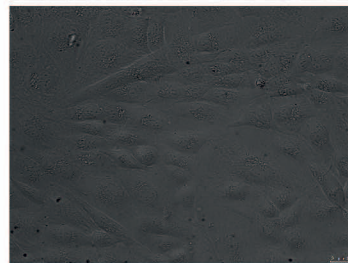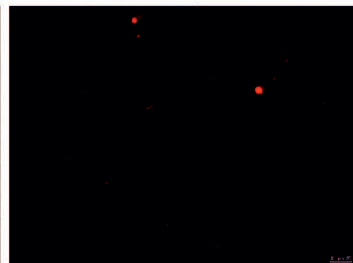

Sal 10  $\mu$ M

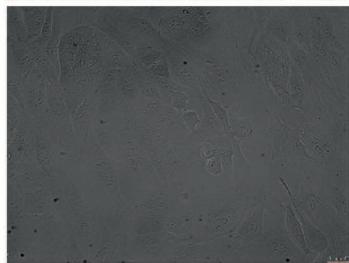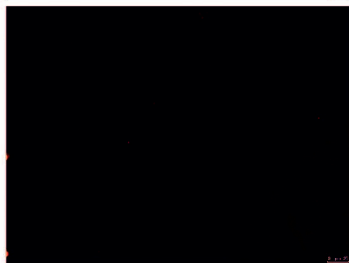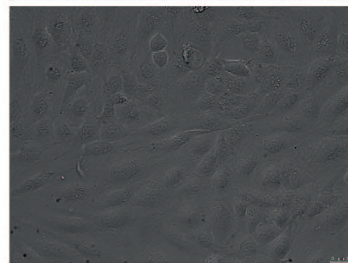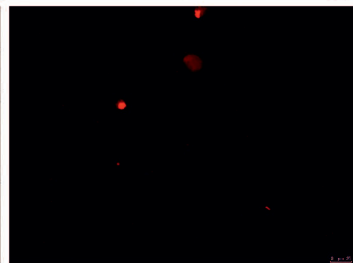

Nig 1  $\mu$ M

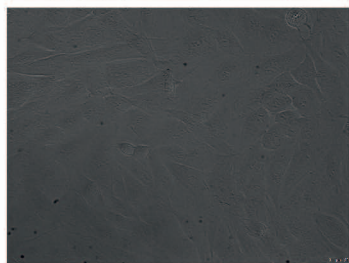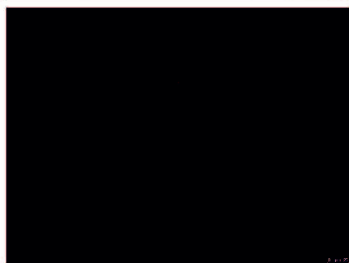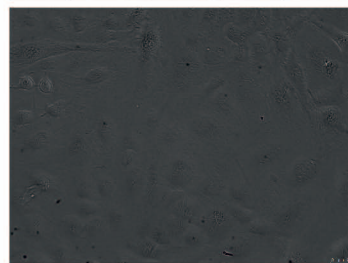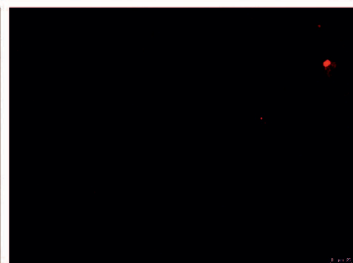

Val 10  $\mu$ M

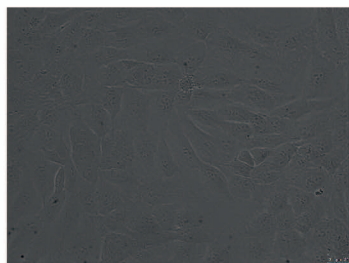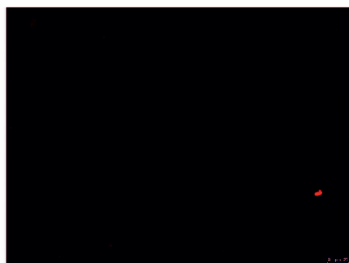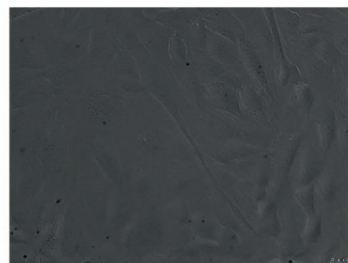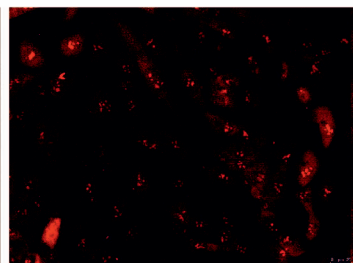

Antimycin  
2  $\mu$ g/mL

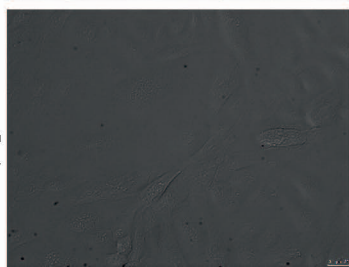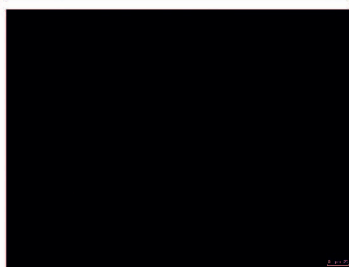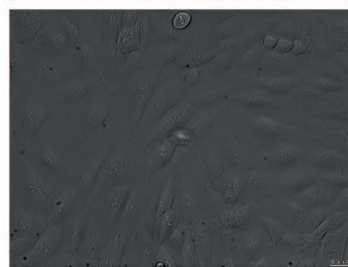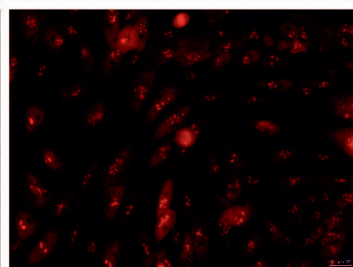

# Figure S6

## Mitochondrial depolarization

t = 0 min

t = 60 min

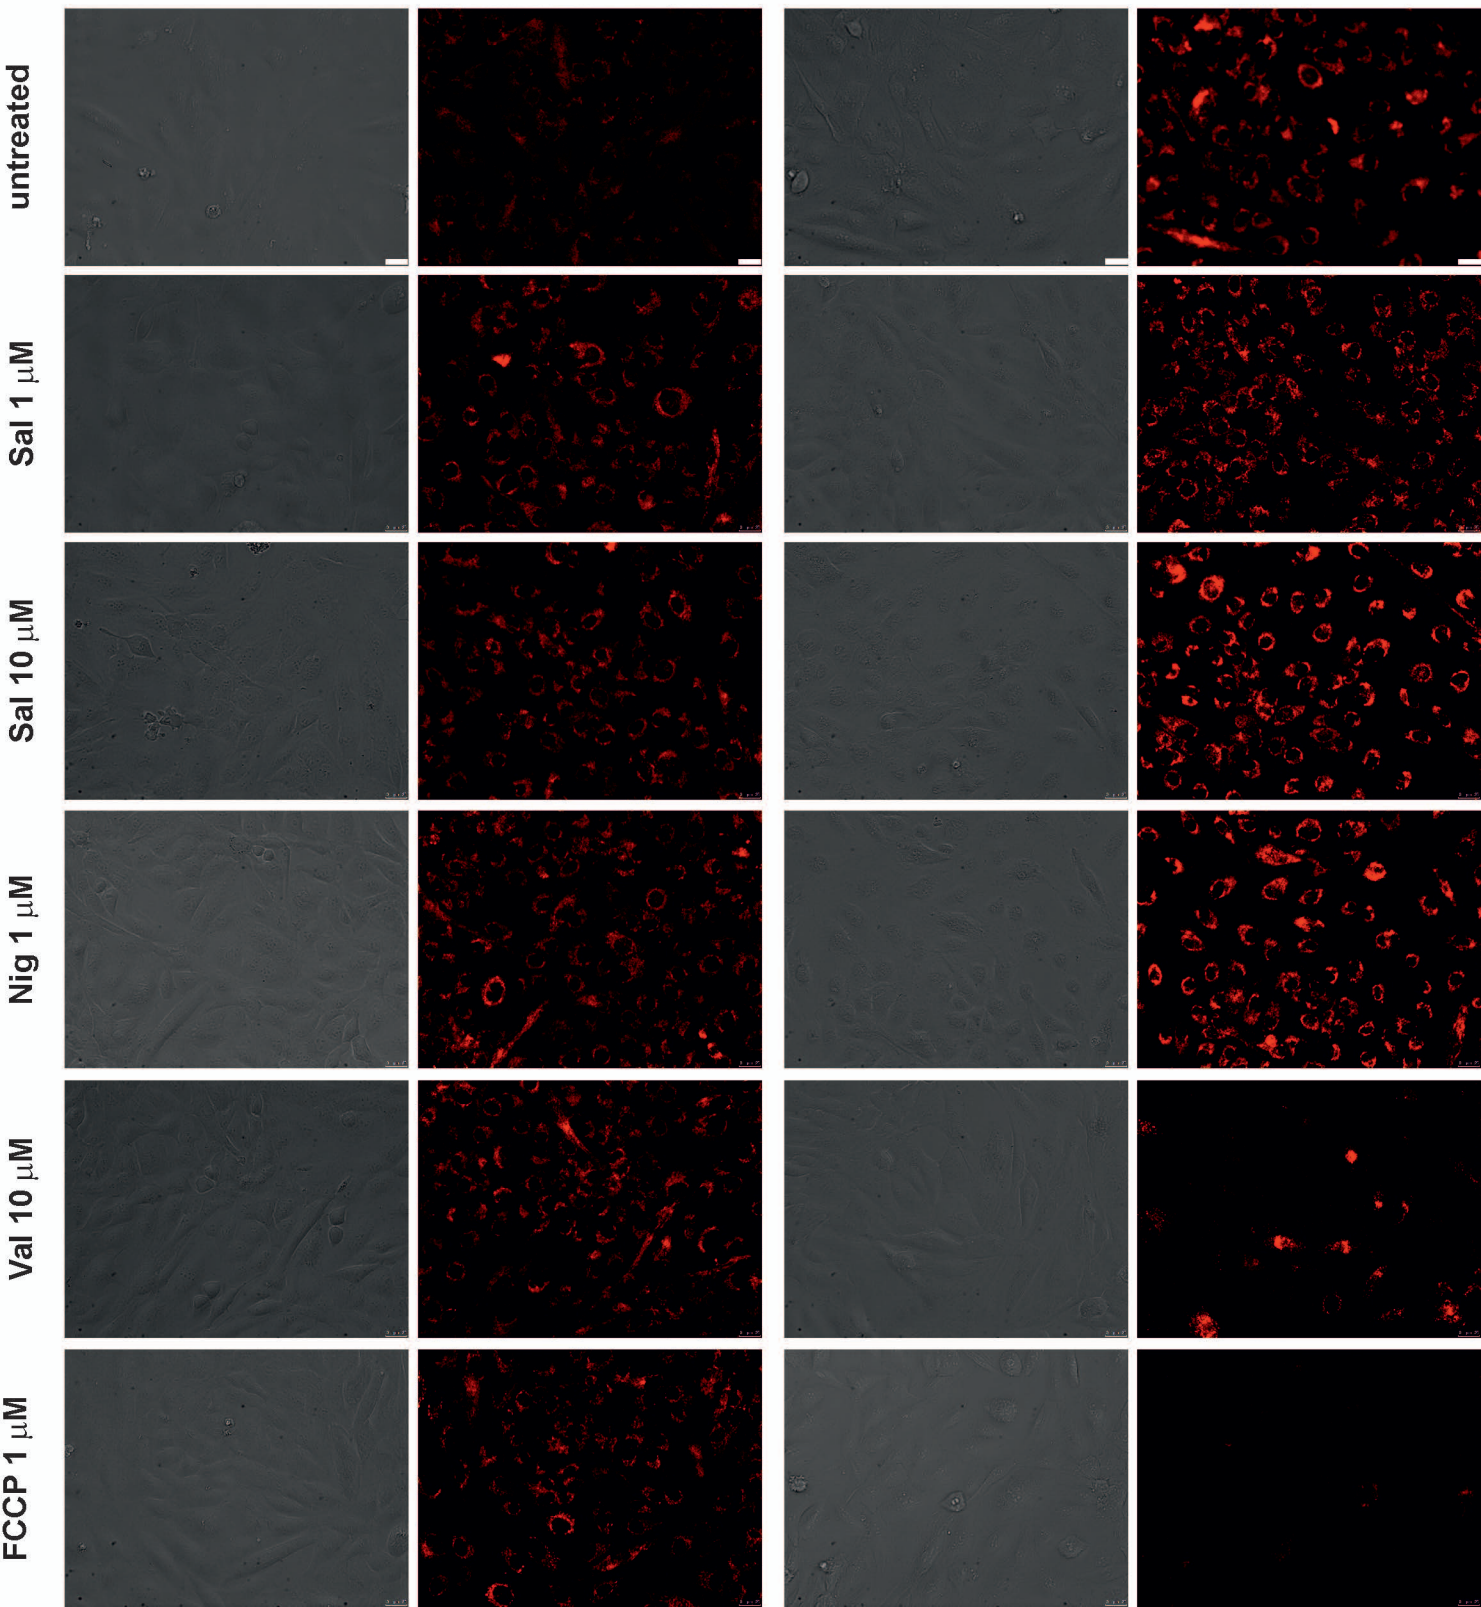

# Figure S7

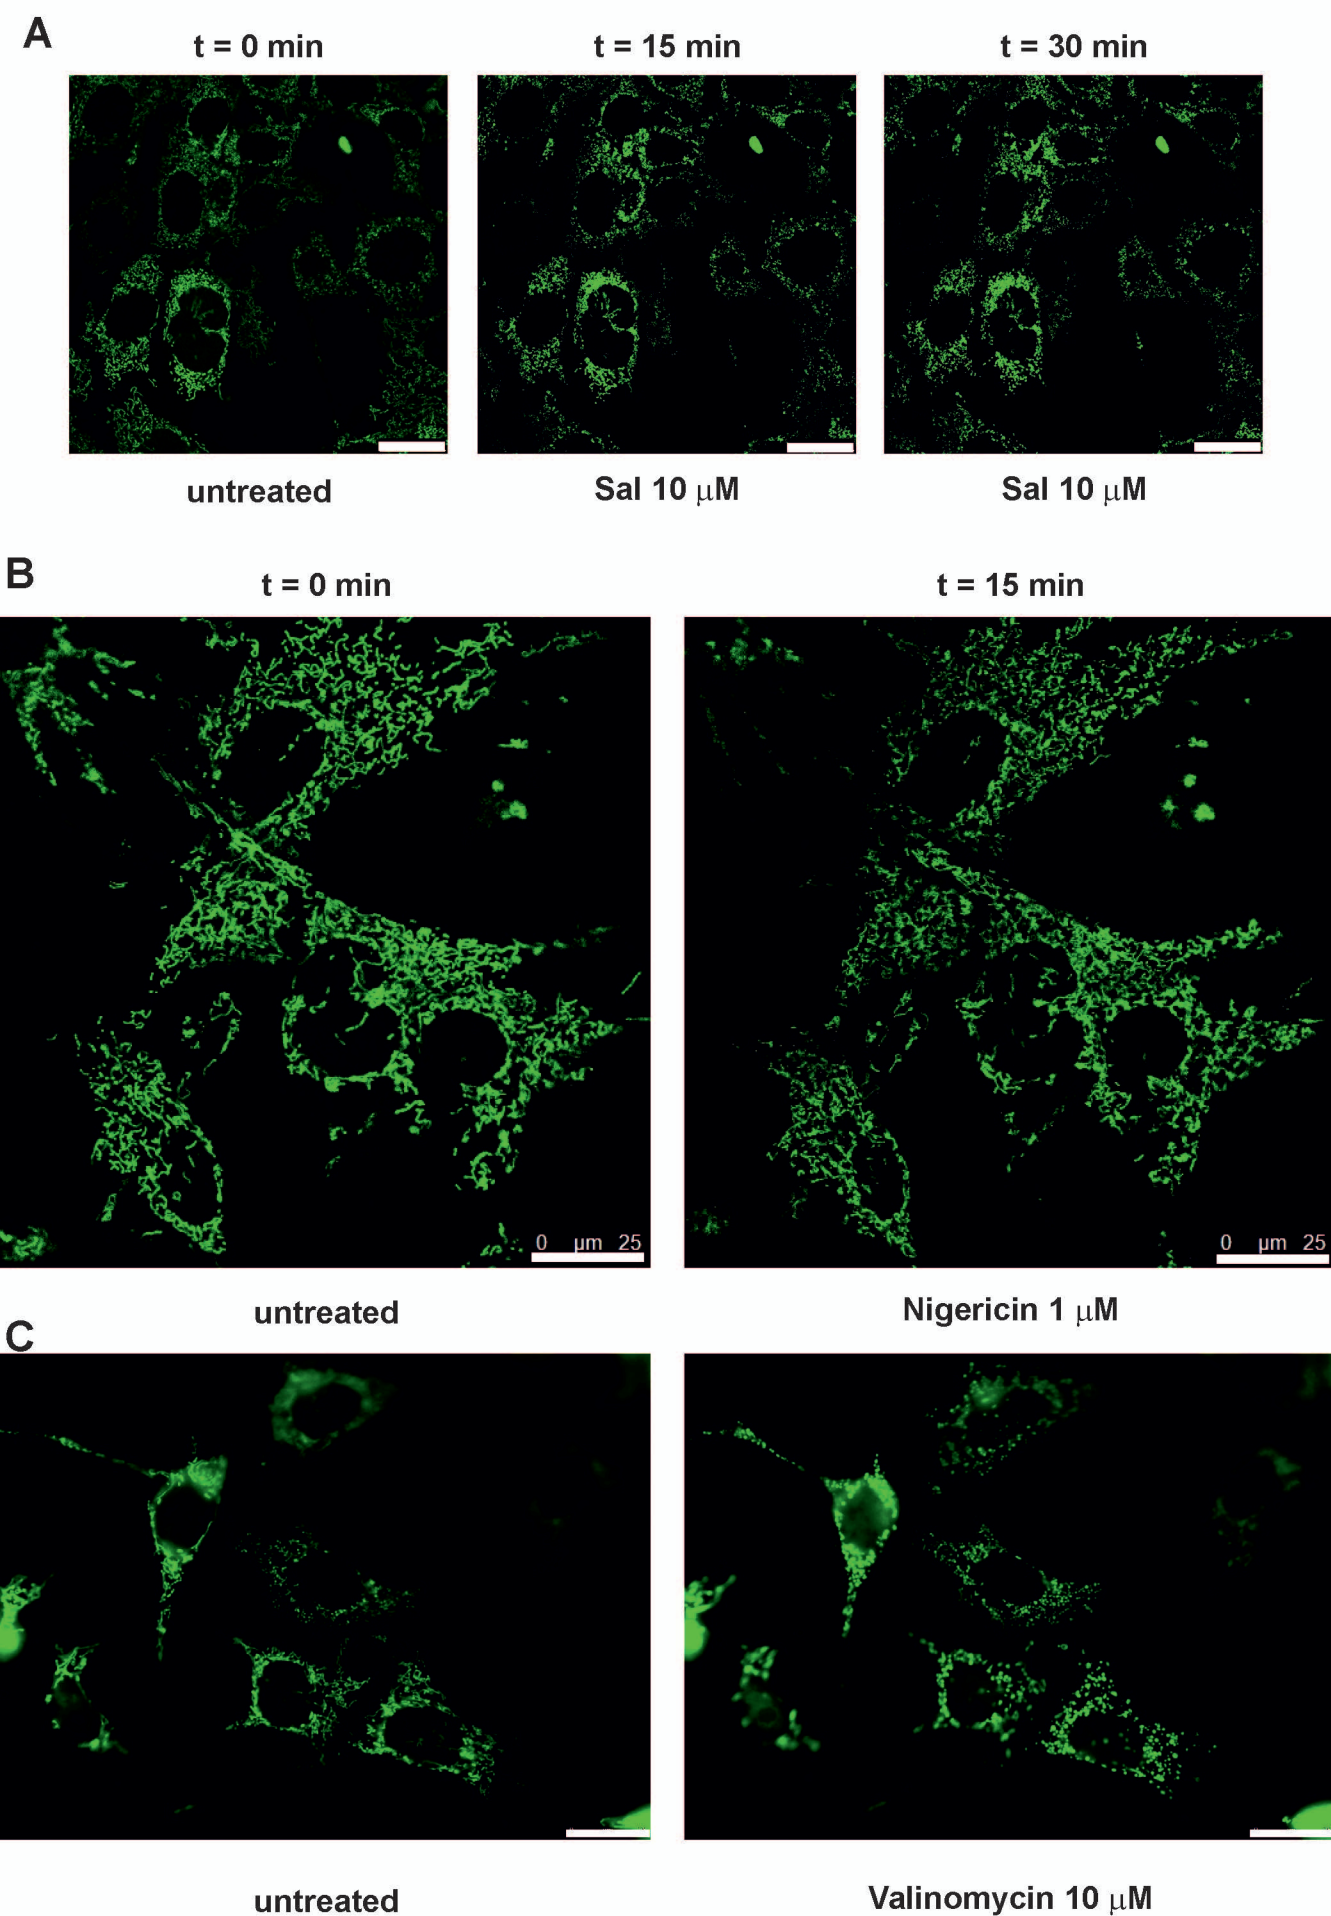

## Figure S8

control MSC

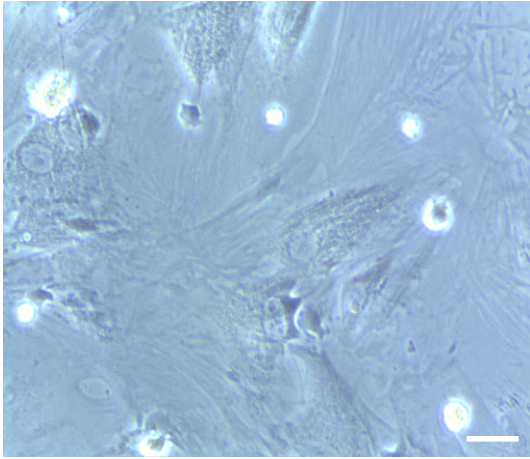

Salinomycin 5  $\mu$ M

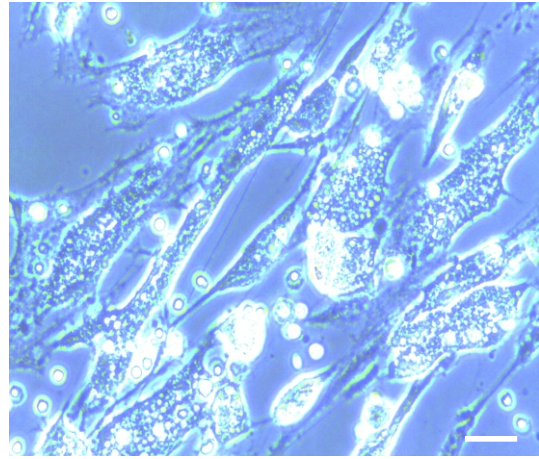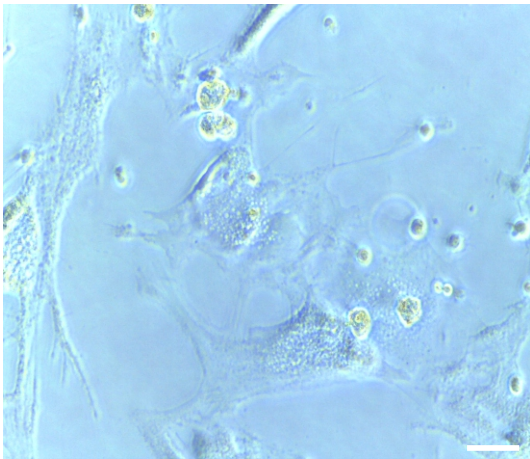

Salinomycin 10  $\mu$ M

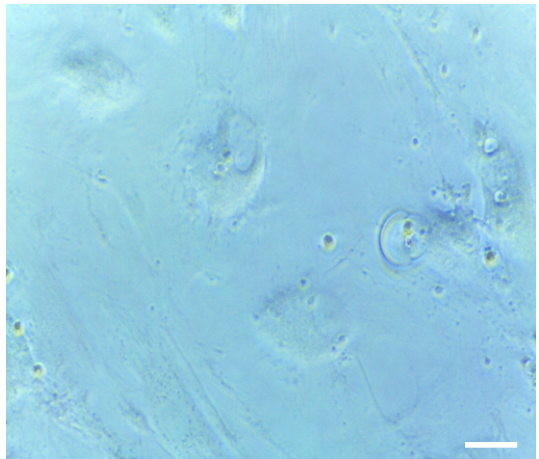

Staurosporine 1  $\mu$ M



# Figure S9

## Mesenchymal Stromal cells (MSC)

untreated

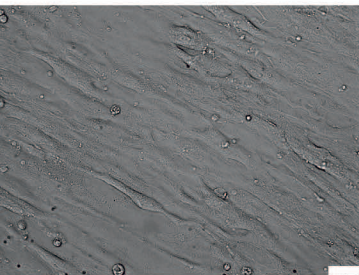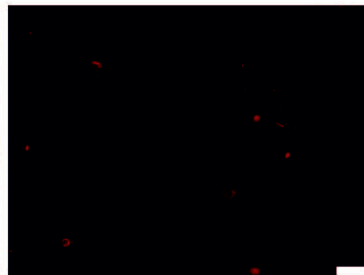

Staurosporine 1  $\mu$ M

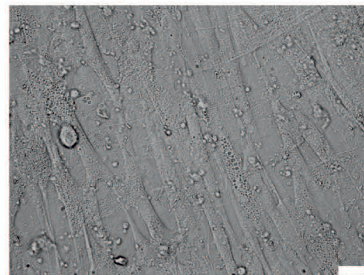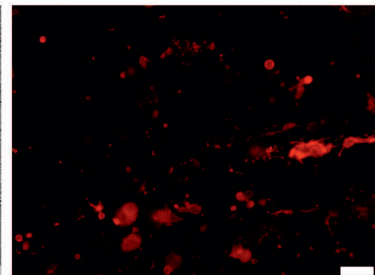

Salinomycin 1  $\mu$ M

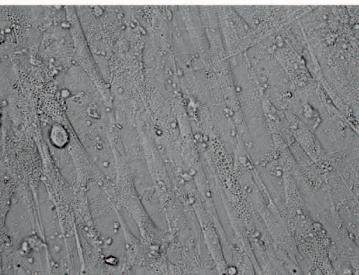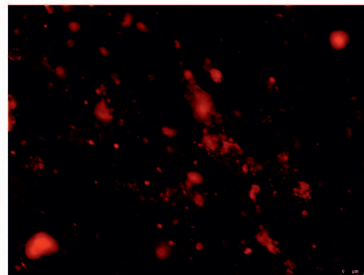

Salinomycin 10  $\mu$ M

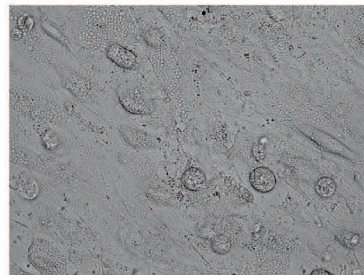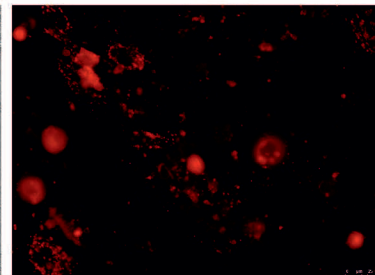

Nigericin 1  $\mu$ M

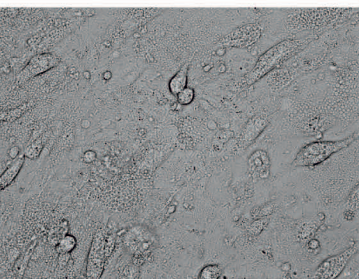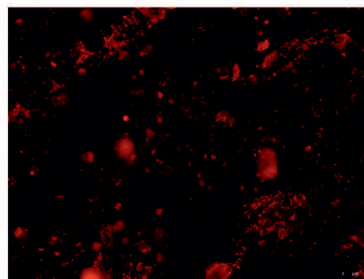

Valinomycin 10  $\mu$ M

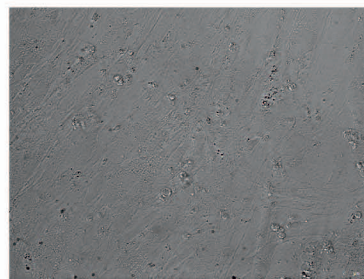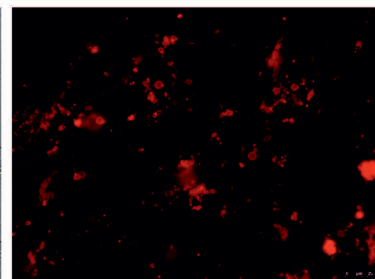

Supplement: cddis2015263x1.pdf [file cddis2015263x1.pdf]
